# Supplementary material
Source: MDPI journal article supplement (https://www.mdpi.com/2076-3417/13/2/832)
Supplement: s1 [file s1]

## CERTIFICATE OF ANALYSIS

Product Name : HR1901-W  
 Description : Dry aqueous solution extract of *Benincasa hispida*  
 Manufacture date : April 2022  
 Retest date : September 2023

| Parameter            | Specification      | Result              |
|----------------------|--------------------|---------------------|
| Appearance           | Dark brown powder  | Complies            |
| Moisture content     | $\leq 7\%$         | 4%                  |
| <b>2-Furoic acid</b> | 0.31 ~ 0.47 mg/g   | 0.34 mg/g           |
| Heavy metals         |                    |                     |
| Lead                 | $\leq 1\text{ppm}$ | Not Detected in 1kg |
| Mercury              | $\leq 1\text{ppm}$ | Not Detected in 1kg |
| Arsenic              | $\leq 1\text{ppm}$ | Not Detected in 1kg |
| Cadmium              | $\leq 1\text{ppm}$ | Not Detected in 1kg |
| Microbial limits     |                    |                     |
| Bacteria             | $\leq 10^2$        | Absent in 1g        |
| Escherichia coli     | Negative           | Negative            |

Authorized Signature : 

Date : May 2022
